# Supplementary material
Source: PubMed Central journal article supplement (PMC10248539)
Supplement: sj-pdf-1-jrs-10.1177_01410768231157017.pdf [file sj-pdf-1-jrs-10.1177_01410768231157017.pdf]

## Supplementary Appendix

### IMPACT OF COVID-19 VACCINATION ON COVID-19 ADMISSIONS IN ENGLAND DURING 2021

#### An observational study

Felicity Cornforth<sup>1</sup>, Lucie Webber<sup>1</sup>, Gabriele Kerr<sup>2</sup>, Hywell Dinsdale<sup>3,4</sup>, Peter Greengross<sup>1,3</sup>, Azeem Majeed<sup>5</sup>

<sup>1</sup>Imperial College Healthcare NHS Trust, The Bays, South Wharf Road, St Mary's Hospital, London, W2 1NY

<sup>2</sup>NIHR Applied Research Collaboration North West London, Chelsea and Westminster Hospital, 369 Fulham Rd, London SW10 9NH

<sup>3</sup> NHS England, Wellington House, 133-155 Waterloo Road, South Bank, London SE1 8UG

<sup>4</sup>Integral Health Solutions, Daresbury Innovation Centre, Keckwick Ln, Daresbury, Warrington WA4 4FS

<sup>5</sup>Department of Primary Care & Public Health, Imperial College London, Charing Cross Campus, The Reynolds Building, St Dunstan's Road, London, W6 8RP

## Supplementary Appendix

### Contents

|                                                                                                                                   |   |
|-----------------------------------------------------------------------------------------------------------------------------------|---|
| Supplementary Figure 1: Vaccination coverage of English population aged 16 and above by age group, January to December 2021.....  | 2 |
| Supplementary Figure 2: Vaccination coverage of English population aged 16 and above by risk group, January to December 2021..... | 3 |
| Supplementary Table 1: NHS confirmed population adjustment population table .....                                                 | 4 |
| Supplementary Table 2: Admission rates per 100,000 person-days by vaccination status, January to December 2021.....               | 5 |

**Supplementary Figure 1: Vaccination coverage of English population aged 16 and above by age group, January to December 2021.**

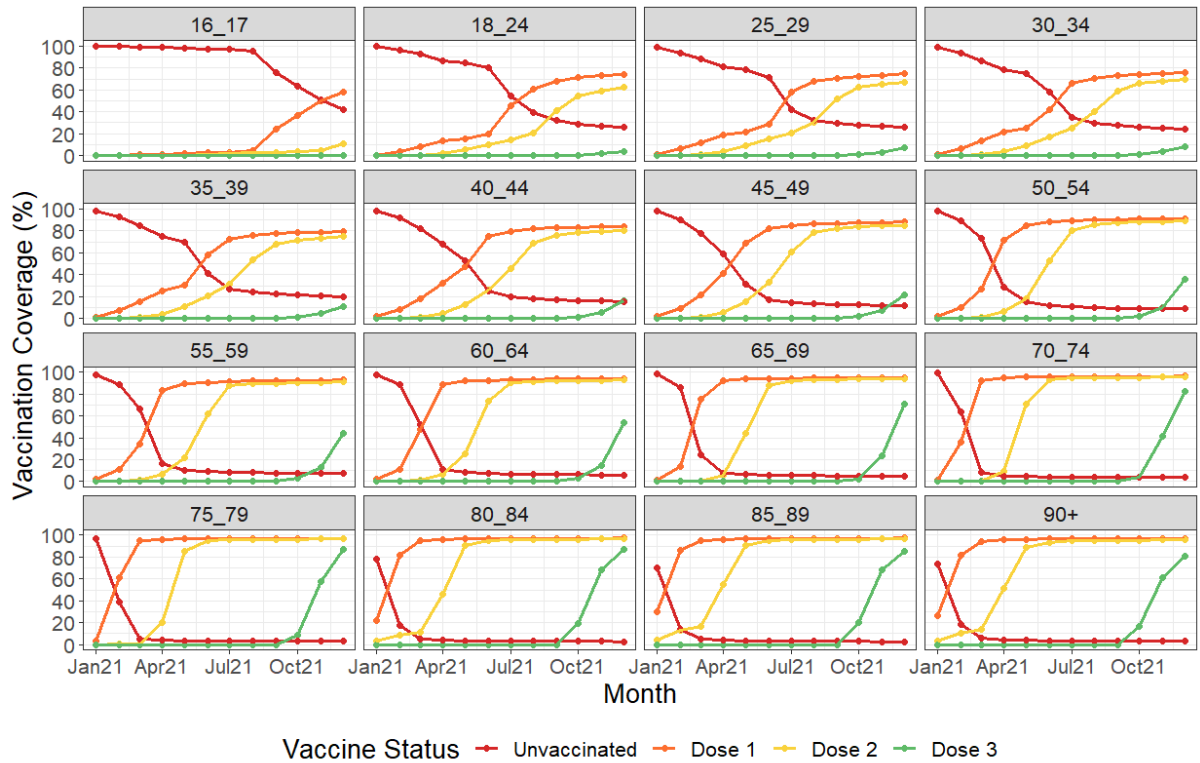

**Supplementary Figure 2: Vaccination coverage of English population aged 16 and above by risk group, January to December 2021.**

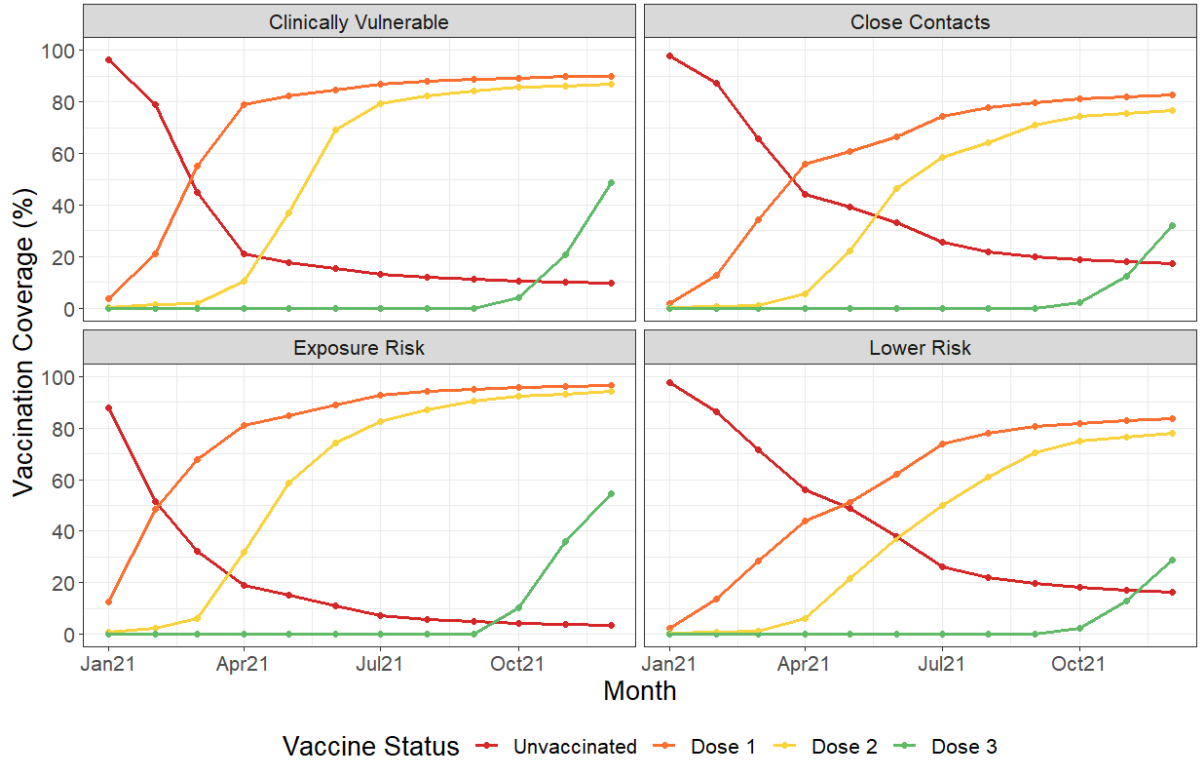

**Supplementary Table 1: NHS confirmed population adjustment population table**

This table shows how the number of registered patients in mid-2021, and the number of these that had recent NHS contact (the numerator used in the analysis), as compared to ONS estimates of the English population.

ONS estimates population estimates are mid-year estimates for the year 2020 (the most recent estimates available at the time of analysis) [18]. Age in the ONS data has been offset by +2 years to align with the age of patients in the GP-register data (which shows the age at the time of data extraction, in mid-2022).

| Age Band     | ONS Estimate      | All Registered Patients | Patients with recent NHS contact |
|--------------|-------------------|-------------------------|----------------------------------|
| 16-17        | 1,301,781         | 1,353,541               | 1,279,039                        |
| 18-24        | 4,504,973         | 4,906,147               | 4,650,019                        |
| 25-29        | 3,663,874         | 4,188,967               | 3,854,311                        |
| 30-34        | 3,863,161         | 4,610,478               | 4,218,202                        |
| 35-39        | 3,760,672         | 4,459,668               | 4,068,722                        |
| 40-44        | 3,634,598         | 4,174,881               | 3,843,648                        |
| 45-49        | 3,440,223         | 3,849,576               | 3,607,406                        |
| 50-54        | 3,841,135         | 4,160,916               | 3,984,486                        |
| 55-59        | 3,882,290         | 4,107,123               | 3,977,392                        |
| 60-64        | 3,429,417         | 3,567,186               | 3,480,913                        |
| 65-69        | 2,914,431         | 2,960,522               | 2,908,068                        |
| 70-74        | 2,782,134         | 2,781,592               | 2,748,576                        |
| 75-79        | 2,444,402         | 2,341,800               | 2,322,374                        |
| 80-84        | 1,612,686         | 1,541,146               | 1,529,652                        |
| 85-89        | 1,109,421         | 1,008,067               | 1,001,157                        |
| 90+          | 814,481           | 647,706                 | 640,304                          |
| <b>Total</b> | <b>46,999,679</b> | <b>50,659,316</b>       | <b>48,114,269</b>                |

**Supplementary Table 2: Admission rates (AR) per 100,000 person-days by vaccination status, January to December 2021.**

Admission rates were directly standardised for age group, sex, and risk group.

| Month             | Vaccine Status | Admissions | Days Alive    | AR per 100,000 person-days |                  |
|-------------------|----------------|------------|---------------|----------------------------|------------------|
|                   |                |            |               | AR                         | 95% CI           |
| <b>01/01/2021</b> | Unvaccinated   | 66,833     | 1,452,271,240 | 4.930                      | (4.892 to 4.967) |
|                   | Dose 1         | 3,092      | 42,274,683    | 3.763                      | (3.409 to 4.144) |
|                   | Dose 2         | 62         | 4,831,144     | 0.131                      | (0.095 to 0.176) |
|                   | All Vaccinated | 3,154      | 47,105,827    | 3.507                      | (3.174 to 3.865) |
| <b>01/02/2021</b> | Unvaccinated   | 17,886     | 1,116,316,702 | 2.653                      | (2.601 to 2.706) |
|                   | Dose 1         | 4,858      | 222,879,380   | 1.122                      | (1.062 to 1.184) |
|                   | Dose 2         | 63         | 13,374,486    | 0.175                      | (0.065 to 0.377) |
|                   | All Vaccinated | 4,921      | 236,254,283   | 1.073                      | (1.015 to 1.134) |
| <b>01/03/2021</b> | Unvaccinated   | 3,991      | 949,637,071   | 1.007                      | (0.952 to 1.065) |
|                   | Dose 1         | 2,142      | 522,461,639   | 0.249                      | (0.234 to 0.266) |
|                   | Dose 2         | 46         | 23,894,017    | 0.049                      | (0.017 to 0.109) |
|                   | All Vaccinated | 2,188      | 546,359,441   | 0.238                      | (0.223 to 0.254) |
| <b>01/04/2021</b> | Unvaccinated   | 1,111      | 667,447,146   | 0.451                      | (0.410 to 0.496) |
|                   | Dose 1         | 754        | 654,378,201   | 0.090                      | (0.082 to 0.098) |
|                   | Dose 2         | 82         | 124,720,026   | 0.043                      | (0.027 to 0.064) |
|                   | All Vaccinated | 836        | 779,117,425   | 0.074                      | (0.068 to 0.081) |
| <b>01/05/2021</b> | Unvaccinated   | 872        | 595,861,740   | 0.344                      | (0.302 to 0.391) |
|                   | Dose 1         | 305        | 493,851,560   | 0.078                      | (0.065 to 0.093) |
|                   | Dose 2         | 166        | 403,822,623   | 0.025                      | (0.018 to 0.033) |
|                   | All Vaccinated | 471        | 897,728,144   | 0.042                      | (0.037 to 0.046) |
| <b>01/06/2021</b> | Unvaccinated   | 2,367      | 451,952,153   | 0.980                      | (0.920 to 1.044) |
|                   | Dose 1         | 520        | 322,123,695   | 0.307                      | (0.260 to 0.359) |
|                   | Dose 2         | 809        | 670,108,143   | 0.079                      | (0.071 to 0.087) |
|                   | All Vaccinated | 1,329      | 992,336,913   | 0.115                      | (0.108 to 0.122) |
| <b>01/07/2021</b> | Unvaccinated   | 7,891      | 332,313,334   | 4.326                      | (4.192 to 4.464) |
|                   | Dose 1         | 1,091      | 287,105,944   | 1.366                      | (1.232 to 1.510) |
|                   | Dose 2         | 4,661      | 871,641,389   | 0.384                      | (0.371 to 0.398) |
|                   | All Vaccinated | 5,752      | 1,158,945,706 | 0.435                      | (0.423 to 0.446) |
| <b>01/08/2021</b> | Unvaccinated   | 7,410      | 281,160,474   | 5.213                      | (5.053 to 5.376) |
|                   | Dose 1         | 765        | 210,239,413   | 1.587                      | (1.428 to 1.759) |
|                   | Dose 2         | 6,933      | 998,435,034   | 0.523                      | (0.510 to 0.536) |
|                   | All Vaccinated | 7,698      | 1,208,674,447 | 0.560                      | (0.547 to 0.573) |
| <b>01/09/2021</b> | Unvaccinated   | 4,926      | 243,938,596   | 4.057                      | (3.912 to 4.207) |
|                   | Dose 1         | 459        | 120,675,906   | 1.380                      | (1.221 to 1.554) |
|                   | Dose 2         | 7,685      | 1,076,001,940 | 0.584                      | (0.570 to 0.597) |
|                   | All Vaccinated | 8,144      | 1,196,677,846 | 0.605                      | (0.592 to 0.619) |
| <b>01/10/2021</b> | Unvaccinated   | 4,758      | 235,202,058   | 3.981                      | (3.833 to 4.133) |
|                   | Dose 1         | 461        | 89,330,139    | 1.601                      | (1.419 to 1.800) |
|                   | Dose 2         | 9,430      | 1,117,173,092 | 0.758                      | (0.742 to 0.773) |
|                   | Dose 3         | 295        | 46,100,120    | 0.328                      | (0.269 to 0.396) |
|                   | All Vaccinated | 10,186     | 1,252,603,351 | 0.731                      | (0.717 to 0.745) |
| <b>01/11/2021</b> | Unvaccinated   | 4,899      | 214,861,977   | 4.623                      | (4.446 to 4.804) |
|                   | Dose 1         | 414        | 79,470,564    | 1.779                      | (1.565 to 2.014) |
|                   | Dose 2         | 7,159      | 916,008,348   | 0.984                      | (0.959 to 1.009) |

Supplementary material

|                   |                |        |               |       |                  |
|-------------------|----------------|--------|---------------|-------|------------------|
|                   | Dose 3         | 1,059  | 228,284,932   | 0.245 | (0.223 to 0.269) |
|                   | All Vaccinated | 8,632  | 1,223,763,844 | 0.644 | (0.631 to 0.658) |
| <b>01/12/2021</b> | Unvaccinated   | 6,243  | 211,523,315   | 6.082 | (5.878 to 6.291) |
|                   | Dose 1         | 662    | 75,077,602    | 2.599 | (2.344 to 2.874) |
|                   | Dose 2         | 5,188  | 683,769,600   | 1.501 | (1.451 to 1.553) |
|                   | Dose 3         | 3,699  | 514,919,908   | 0.464 | (0.440 to 0.489) |
|                   | All Vaccinated | 9,549  | 1,273,767,110 | 0.702 | (0.688 to 0.716) |
| <b>01/01/2022</b> | Unvaccinated   | 3,742  | 199,550,875   | 4.476 | (4.297 to 4.661) |
|                   | Dose 1         | 664    | 64,124,286    | 3.205 | (2.898 to 3.535) |
|                   | Dose 2         | 3,507  | 338,205,008   | 2.606 | (2.503 to 2.712) |
|                   | Dose 3         | 9,646  | 882,379,012   | 0.854 | (0.836 to 0.873) |
|                   | All Vaccinated | 13,817 | 1,284,708,306 | 1.004 | (0.988 to 1.021) |
| <b>01/02/2022</b> | Unvaccinated   | 1,116  | 173,148,049   | 1.630 | (1.469 to 1.803) |
|                   | Dose 1         | 271    | 53,127,215    | 1.414 | (1.199 to 1.656) |
|                   | Dose 2         | 1,077  | 243,043,590   | 1.049 | (0.974 to 1.128) |
|                   | Dose 3         | 6,399  | 870,720,809   | 0.600 | (0.585 to 0.615) |
|                   | All Vaccinated | 7,747  | 1,166,891,614 | 0.621 | (0.607 to 0.635) |
